# Supplementary material
Source: HighWire-hosted journal article supplement (doi:10.1101/rna.079693.123)
Supplement: Supplemental_Source.xlsx [file Supplemental_Source.xlsx]

## Sheet: Sheet1
Transposable Element	Sample	log2 fold change	P-value	Adjusted P-value
L1MdTf_III	C_v_KO	0.899204	5.06329e-09	1.83156e-07
L1MdGf_II	C_v_KO	1.22577	3.17466e-09	1.50796e-07
L1MdTf_I	C_v_KO	1.18713	8.55114e-09	2.15946e-07
L1MdA_I	C_v_KO	0.816171	0.0147704	0.0719582
L1MdTf_II	C_v_KO	1.19923	5.78388e-09	1.83156e-07
L1MdA_II	C_v_KO	0.985285	0.00128554	0.00939433
L1Md_Gf_5end	C_v_KO	0.801515	9.09246e-09	2.15946e-07
L1_MM	C_v_KO	0.865449	0.00805773	0.043742
L1MdGf_I	C_v_KO	1.42487	4.80787e-14	9.13496e-12
L1MdA_IV	C_v_KO	0.905452	1.71003e-06	2.95369e-05
L1MdTf_III	C_v_EV	0.633941	3.7862e-05	0.000633329
L1MdGf_II	C_v_EV	0.813428	8.54757e-05	0.0010485
L1MdTf_I	C_v_EV	0.834492	5.19213e-05	0.000796126
L1MdA_I	C_v_EV	0.270217	0.419605	0.702046
L1MdTf_II	C_v_EV	0.86384	2.73851e-05	0.000536724
L1MdA_II	C_v_EV	0.485116	0.113011	0.297057
L1Md_Gf_5end	C_v_EV	0.583224	2.91698e-05	0.000536724
L1_MM	C_v_EV	0.298732	0.360448	0.666207
L1MdGf_I	C_v_EV	1.08395	9.88522e-09	1.81888e-06
L1MdA_IV	C_v_EV	0.532873	0.00488647	0.0280972
L1MdTf_III	C_v_hsTasor	-0.295404	0.0553039	0.0987569
L1MdGf_II	C_v_hsTasor	-0.202792	0.328703	0.391313
L1MdTf_I	C_v_hsTasor	-0.565816	0.00610609	0.050884
L1MdA_I	C_v_hsTasor	-0.745252	0.0260603	0.0834141
L1MdTf_II	C_v_hsTasor	-0.543587	0.00835321	0.0522076
L1MdA_II	C_v_hsTasor	-0.482588	0.115134	0.179897
L1Md_Gf_5end	C_v_hsTasor	-0.699123	7.17717e-07	1.79429e-05
L1_MM	C_v_hsTasor	-0.695724	0.0332565	0.0834141
L1MdGf_I	C_v_hsTasor	-0.412181	0.0296975	0.0834141
L1MdA_IV	C_v_hsTasor	-0.160418	0.398189	0.432814
L1MdTf_III	C_v_del3	0.57096	0.000205928	0.00265418
L1MdGf_II	C_v_del3	0.911718	1.05598e-05	0.000204156
L1MdTf_I	C_v_del3	0.677358	0.00102023	0.00986221
L1MdA_I	C_v_del3	0.660569	0.0484707	0.200807
L1MdTf_II	C_v_del3	0.707876	0.000588118	0.00620197
L1MdA_II	C_v_del3	0.786421	0.0101821	0.0649523
L1Md_Gf_5end	C_v_del3	0.377925	0.00674131	0.047753
L1_MM	C_v_del3	0.677403	0.0380804	0.180299
L1MdGf_I	C_v_del3	1.12723	2.47579e-09	2.87191e-07
L1MdA_IV	C_v_del3	0.660579	0.000479572	0.00529813
L1MdTf_III	C_v_delD	0.673459	1.19716e-05	0.00022746
L1MdGf_II	C_v_delD	0.978338	2.27517e-06	8.64564e-05
L1MdTf_I	C_v_delD	0.91388	9.3333e-06	0.000209112
L1MdA_I	C_v_delD	0.680751	0.0420023	0.162866
L1MdTf_II	C_v_delD	0.937541	5.30591e-06	0.00016687
L1MdA_II	C_v_delD	0.818142	0.00751296	0.0455892
L1Md_Gf_5end	C_v_delD	0.616007	9.90529e-06	0.000209112
L1_MM	C_v_delD	0.712269	0.0292034	0.120623
L1MdGf_I	C_v_delD	1.23945	5.49405e-11	5.21935e-09
L1MdA_IV	C_v_delD	0.698084	0.000224252	0.00224252
L1MdTf_III	C_v_hsChimera	-0.348259	0.0238133	0.0945407
L1MdGf_II	C_v_hsChimera	-0.204704	0.323859	0.50691
L1MdTf_I	C_v_hsChimera	-0.627057	0.00237284	0.0320334
L1MdA_I	C_v_hsChimera	-0.738098	0.0275166	0.0990596
L1MdTf_II	C_v_hsChimera	-0.601876	0.00349415	0.0377368
L1MdA_II	C_v_hsChimera	-0.511952	0.0945998	0.23062
L1Md_Gf_5end	C_v_hsChimera	-0.79657	1.56895e-08	1.69446e-06
L1_MM	C_v_hsChimera	-0.711185	0.0295196	0.0996287
L1MdGf_I	C_v_hsChimera	-0.273549	0.148727	0.28683
L1MdA_IV	C_v_hsChimera	-0.160156	0.398574	0.597861
L1MdTf_III	C_v_zfChimera	-0.202683	0.18821	0.759074
L1MdGf_II	C_v_zfChimera	-0.0794991	0.701472	0.898173
L1MdTf_I	C_v_zfChimera	-0.31065	0.132089	0.707064
L1MdA_I	C_v_zfChimera	-0.619839	0.0641603	0.460941
L1MdTf_II	C_v_zfChimera	-0.283028	0.169546	0.759074
L1MdA_II	C_v_zfChimera	-0.395002	0.197082	0.759074
L1Md_Gf_5end	C_v_zfChimera	-0.585493	3.08602e-05	0.00421242
L1_MM	C_v_zfChimera	-0.57816	0.0768083	0.487643
L1MdGf_I	C_v_zfChimera	-0.175854	0.353092	0.842756
L1MdA_IV	C_v_zfChimera	-0.107373	0.571264	0.893053
